# Supplementary material
Source: PubMed Central journal article supplement (PMC7843230)
Supplement: jci-131-130319-s038.pdf [file jci-131-130319-s038.pdf]

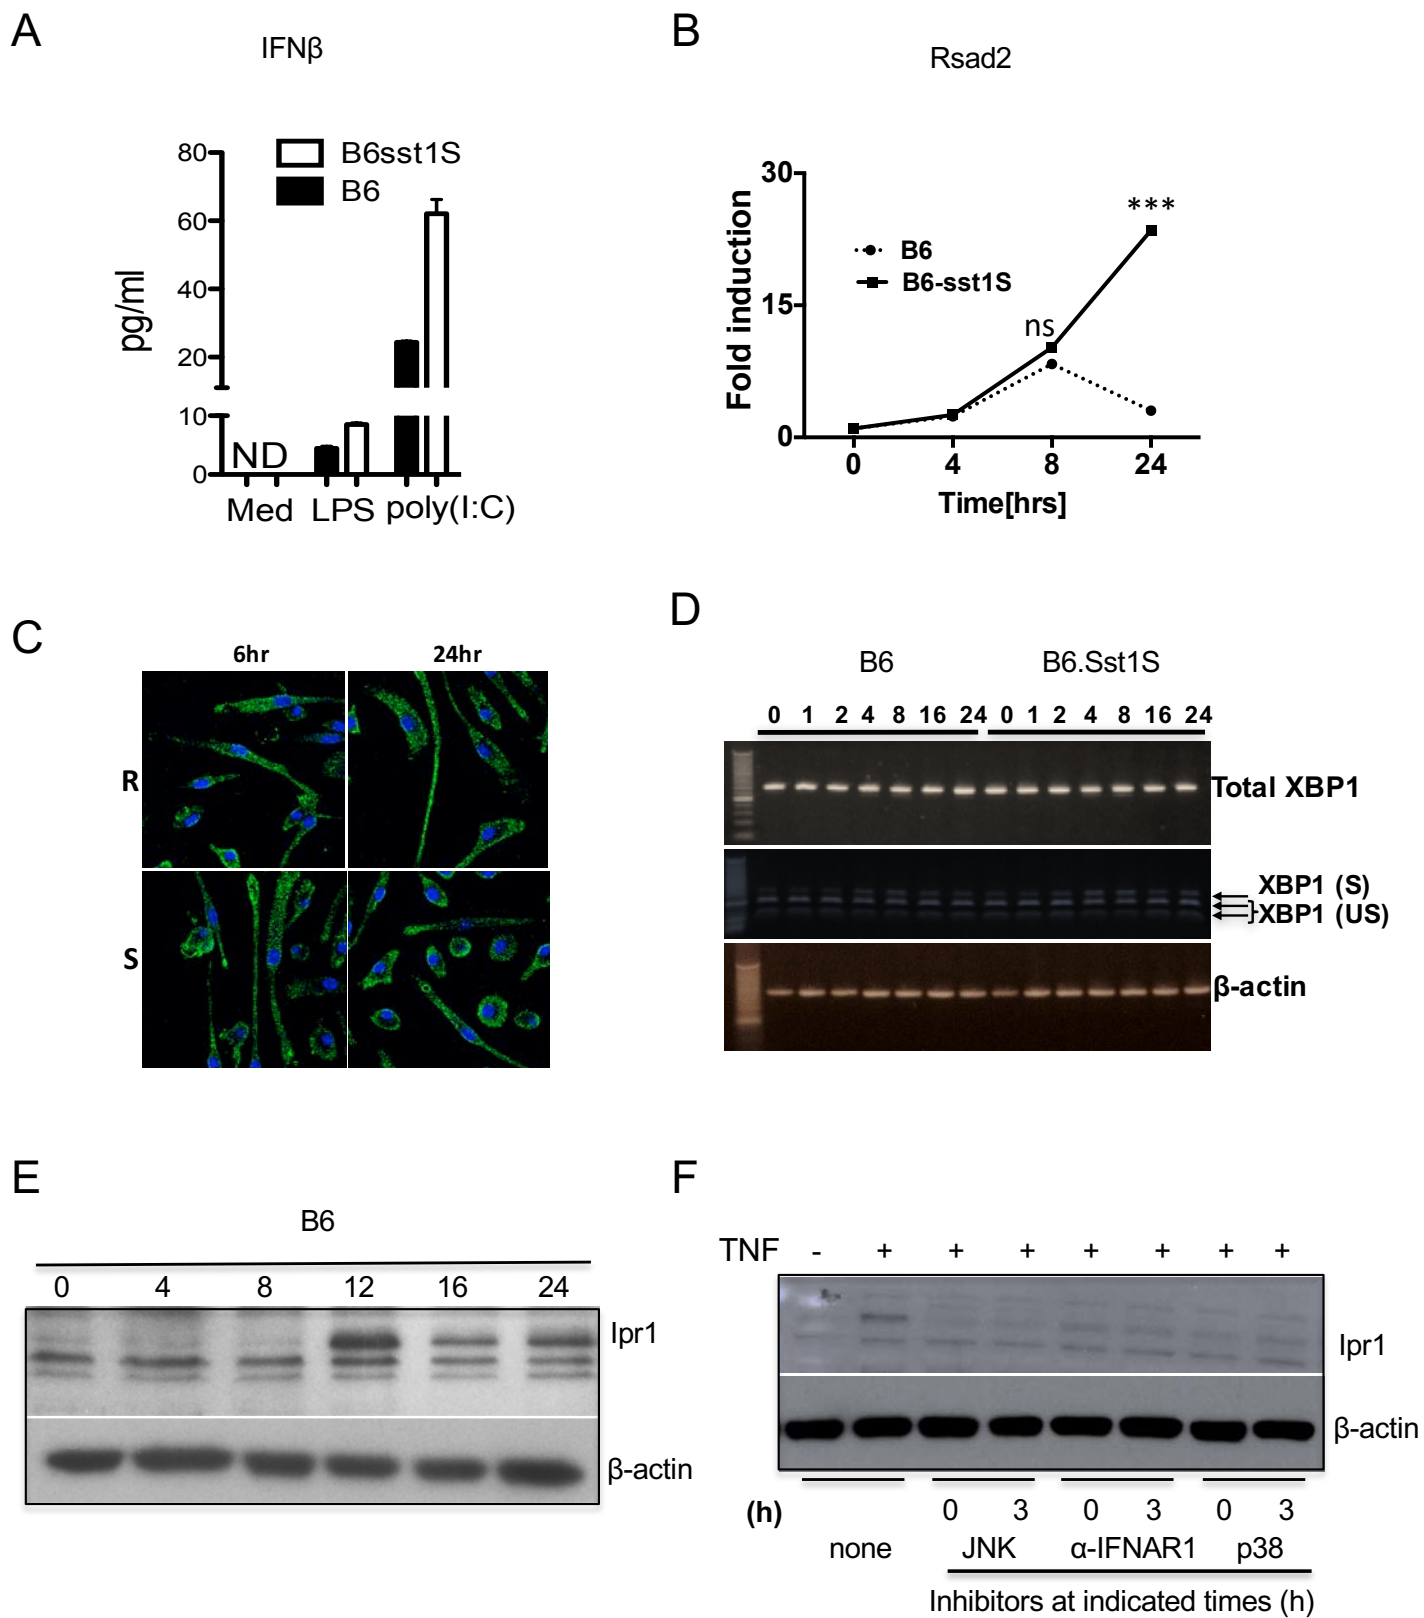

Suppl.Fig. 1

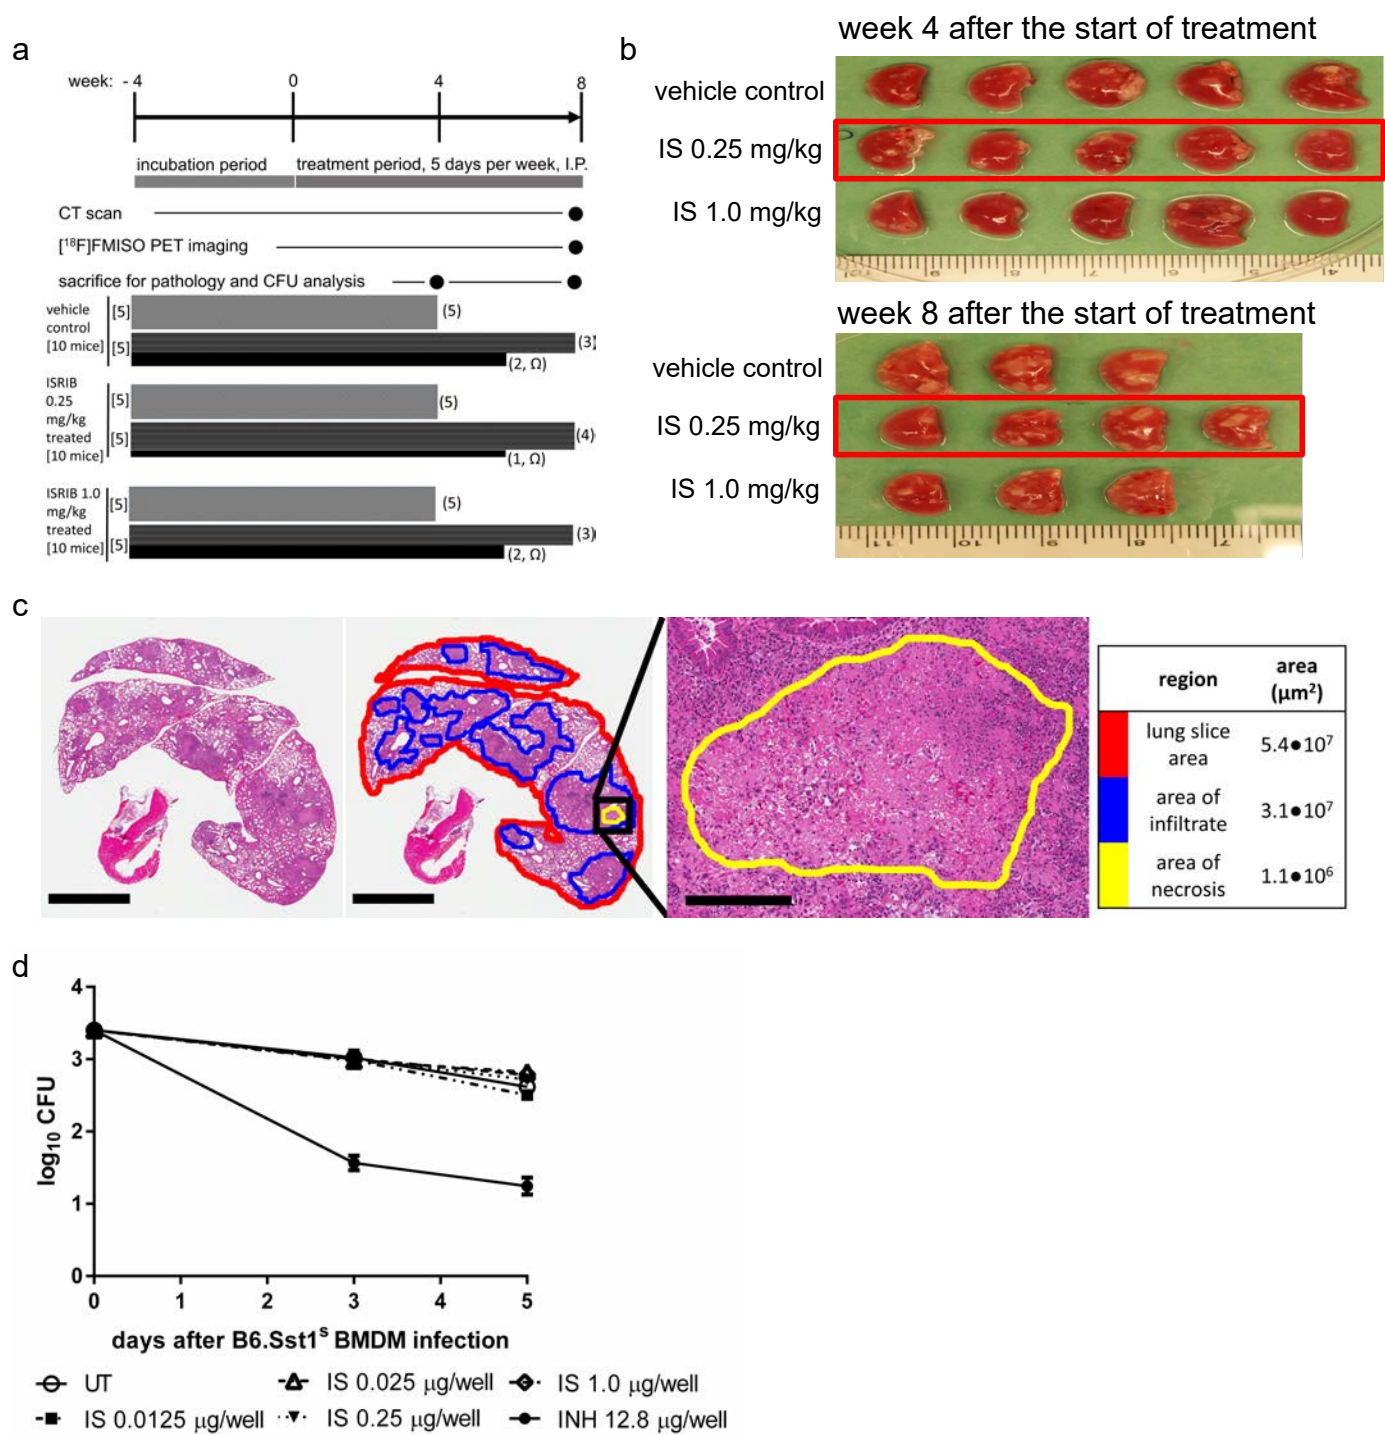

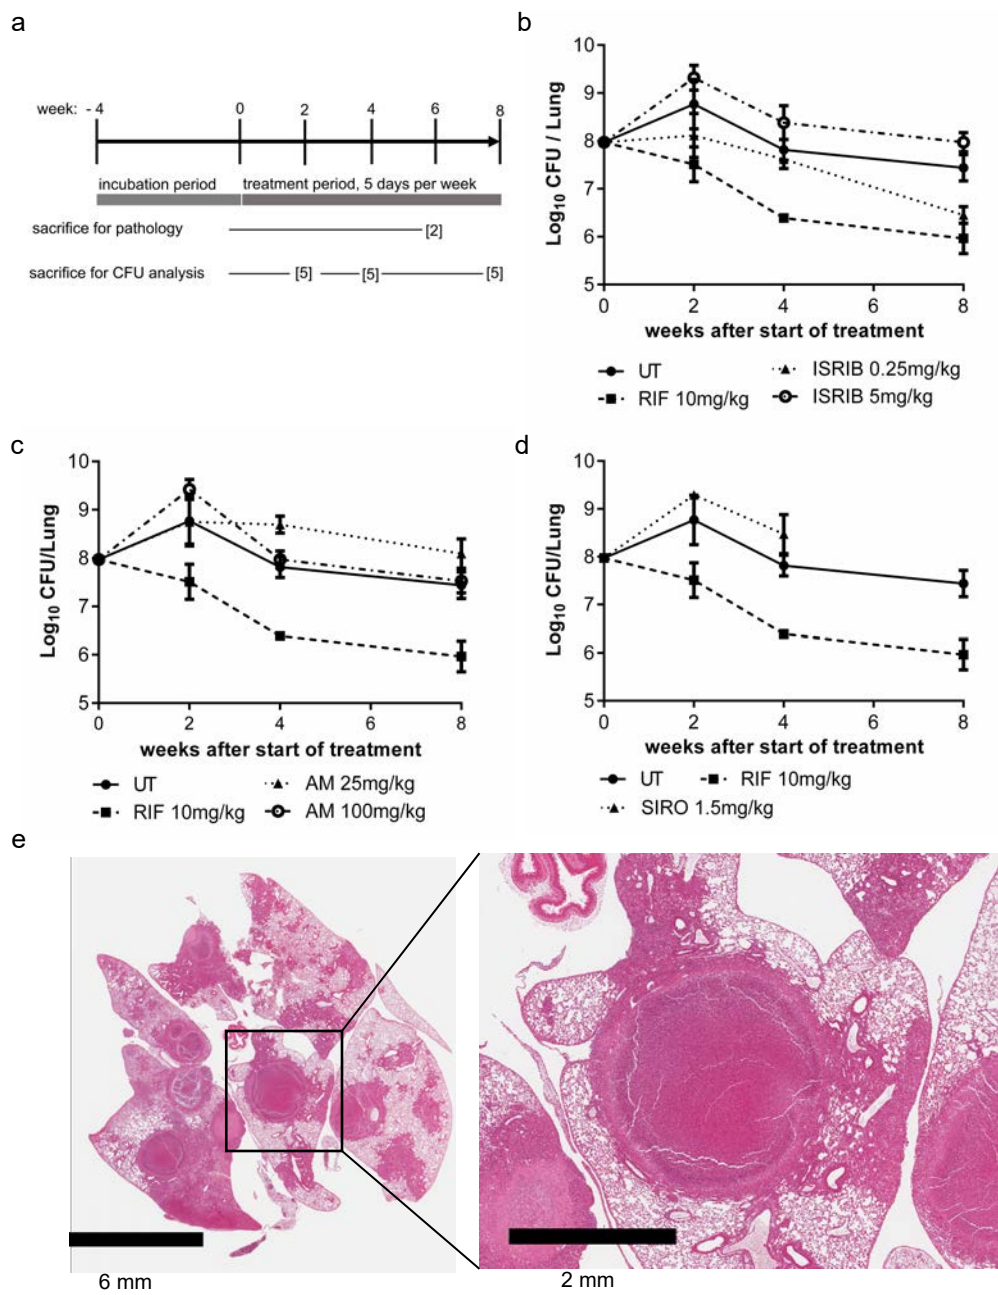

Suppl.Fig.3

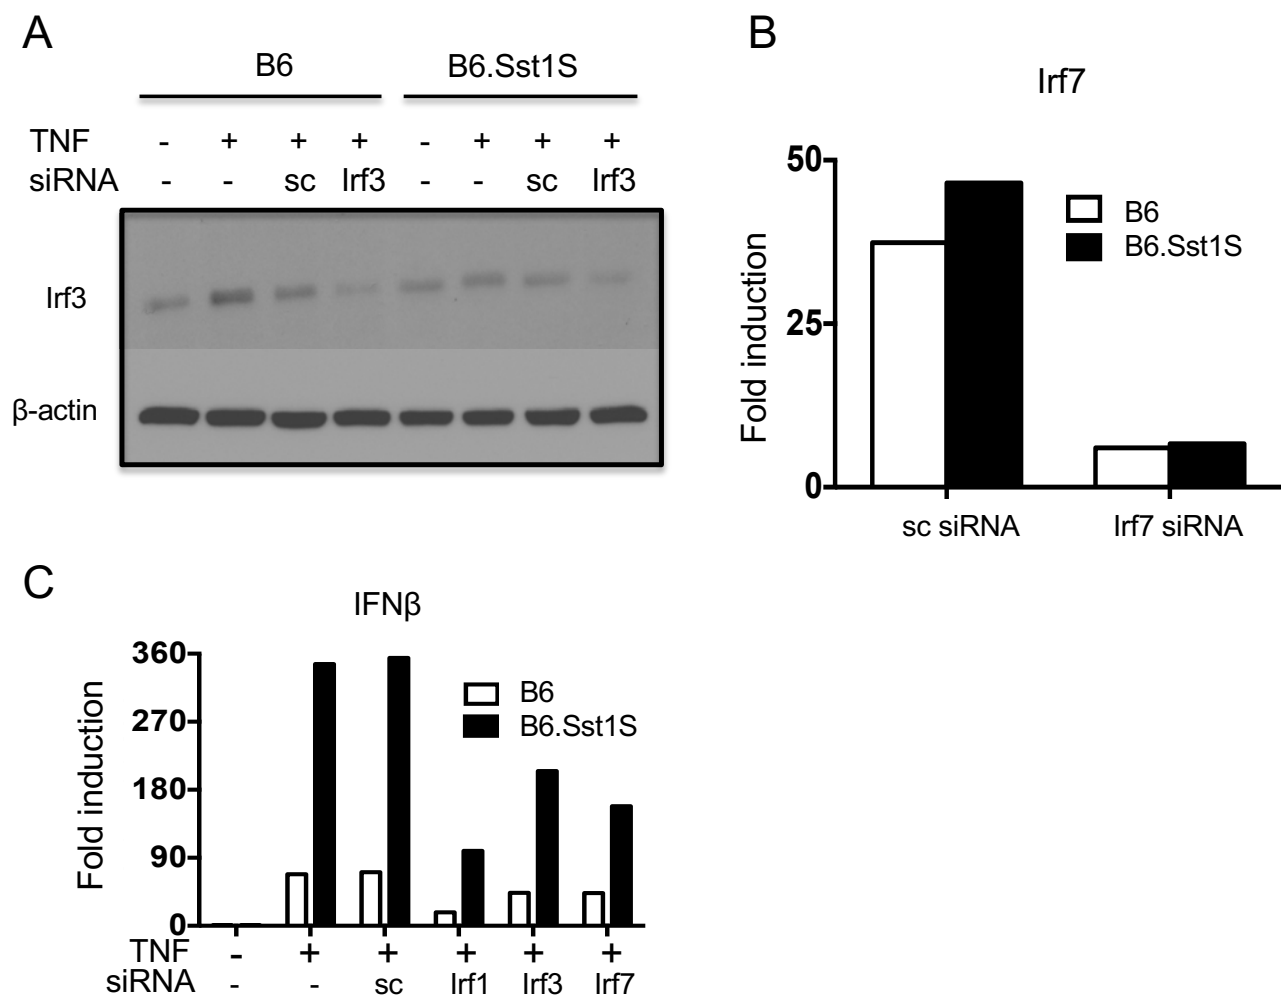

A

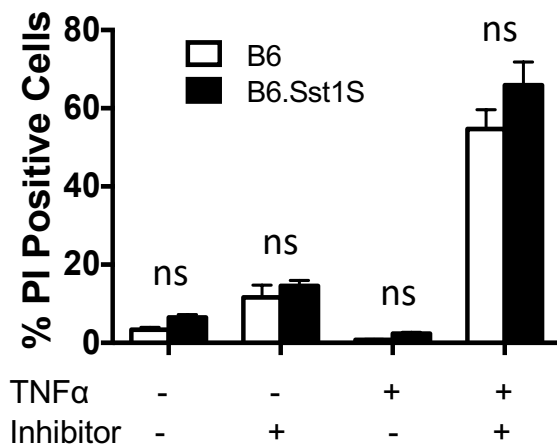

B

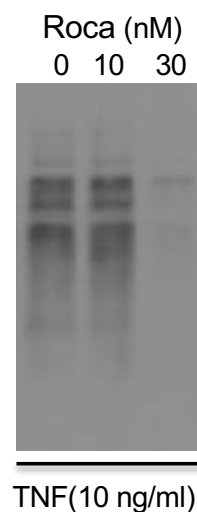

C

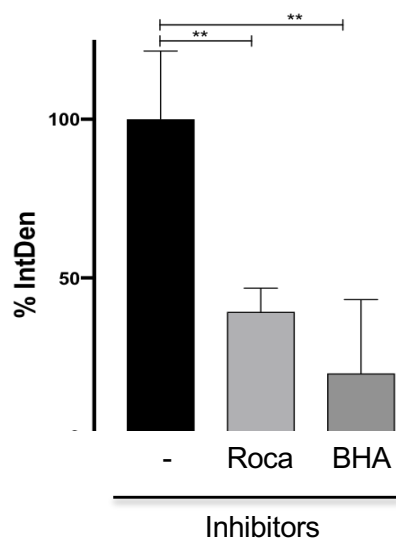

D

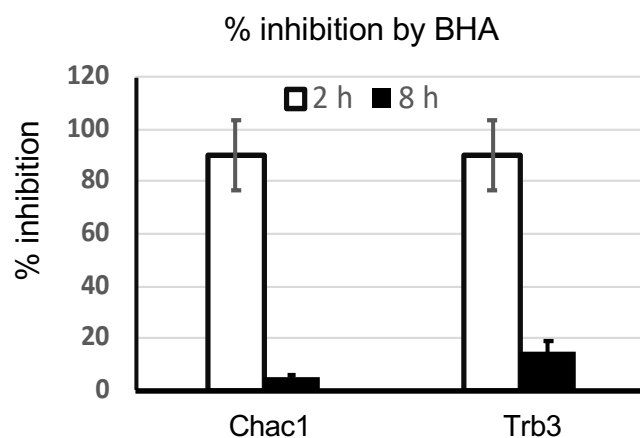

E

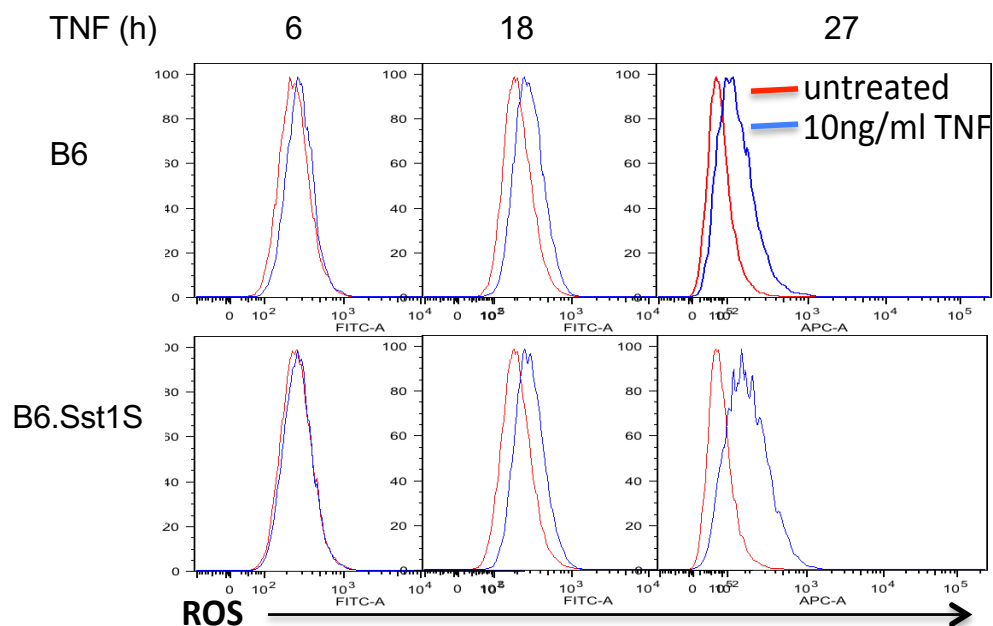

## **Supplemental Figure legends**

### **Supplemental Figure 1.**

- a)** IFN $\beta$  concentrations in supernatants of B6wt and B6.Sst1S BMDM treated with 100ng/ml LPS and 1ug/ml poly IC for 24h, as determined by ELISA.
- b)** Time course of Rsad2 mRNA expression in B6wt and B6.Sst1S BMDM treated with 10ng/ml TNF (representative of two independent experiments).
- c)** Staining with dsRNA-specific J2 antibodies of B6wt and B6.Sst1S BMDMs treated with 10ng/ml TNF for 6 and 24 h. Cells were stained with J2 antibody (green); nuclei are counterstained with DAPI (blue). All microscopic images represent data from two independent experiments.
- d)** Time course analysis of XBP-1 mRNA expression and splicing in TNF-stimulated B6wt and B6.Sst1S BMDMs. Total RNA samples isolated from TNF stimulated B6wt and B6.Sst1S BMDM were amplified using RT-PCR and digested with Pst1, as described in Methods. The resultant PCR products were separated by electrophoresis on 2% agarose gel. The PCR products of spliced XBP1(S) remained intact, whereas the PCR products of unspliced XBP1(U) mRNA were cut into two fragments as indicated by arrows.
- e)** The kinetics of the IPR1 protein expression in B6wt macrophages after TNF stimulation. No IPR1 protein was detected in corresponding samples of B6.Sst1S BMDMs.
- f)** Effects of JNK and p38 inhibitors and IFNAR blockade on IPR1 protein induction in B6wt BMDM treated with 10ng/mL of TNF $\alpha$  for 24 h. The inhibitors were added at the beginning (0hr) or after 3hrs of TNF stimulation. Immunoblotting was carried out using rabbit anti-IPR1 polyclonal antibody and represents two independent experiments.

**Supplemental Figure 2.** Effect of ISRIB on TB progression in B6.Sst1S mice and on *M.tb* replication in B6-sst1S BMDMs.

a) Experimental overview of mouse chronic infection model used to test effects of ISRIB monotherapy on *M. tb* bacterial growth. At left, [#] indicates number of mice in each experimental group and subgroup in the experimental plan. At right, (#) indicates number of mice in each analysis group. (#,  $\Omega$ ) indicates number of mice excluded from analysis because of morbidity and mortality based on IRB and study criteria.

b) Lung gross pathology of B6-sst1S mice infected with *M. tb* following 4 and 8 weeks of ISRIB treatment (8 and 12 weeks post infection).

c) Overview of quantitative lung pathology analysis. Areas were drawn by eye and validated by a veterinary pathologist. Analysis was conducted using Aperio ImageScope (Leica Biosystems)

d) BMDM infection ISRIB dose ranging experiment. B6.Sst1S mice bone marrow derived macrophages were infected with *M. tb* and treated with ISRIB (0.0125, 0.025, 0.25 or 1  $\mu\text{g/ml}$ ) 1 hour after infection. Bacillary loads were enumerated in day 0, 3 and 5 after infection. INH=isoniazid, UT=untreated infected macrophage. IS = ISRIB. Data plotted as means $\pm$ SD.

**Supplemental Figure 3.** Effect of small molecule inhibitors on TB progression in C3HeB/FeJ mice.

a) Overview of experiments and data presented in b – e. [#] indicates number of mice/analysis group at each endpoint.

(b - d) *M. tb*-infected C3HeB/FeJ mice were treated with ISRIB (IS) at doses 0.25 or 5 mg/kg, Amlexanox (AM) at doses 25 or 100 mg/kg, sirolimus (SIRO) at dose 1.5 mg/kg, and untreated (UT). All doses were given 5 days per week during the treatment period. Data plotted as means  $\pm$  SEM.

**e)** Histopathology exemplifying necrotic lung granulomas in a mouse treated with Amlexanox 25mg/kg at week 6 of treatment (H&E staining).

**Supplemental Figure 4.**

**a)** IRF3 expression and validation of IRF3 knockdown using immunoblotting with IRF3-specific antibodies (sc – scrambled control; Irf3 – specific siRNA).

**b)** Validation of Irf7 knockdown in B6wt and B6-sst1S BMDM. Irf7 mRNA expression was quantified using qRT-PCR, normalized to expression of 18S rRNA and presented relative to expression in untreated cells (set as 1). The data are representative of two independent experiments.

**c)** Effects of the Irf1, Irf3 and Irf7 knockdowns on TNF-induced expression of IFN $\beta$  mRNA in B6 and B6-sst1S BMDMs 18 h after stimulation with TNF (10ng/ml).

**Supplemental Figure 5.**

**a)** Synergistic effect of TNF and HSF1 inhibitor KRIB11 on macrophage death. B6 and B6-sst1S BMDM were treated with 10ng/ml TNF $\alpha$  for 24 hrs in presence or absence of 10uM KRIB11. Cell death was assessed using automated microscopy as % of PI positive cells. Data represents results from two independent experiments.

**b)** Inhibition of protein translation in TNF-stimulated BMDM by the rocaglate treatment. TNF and rocaglate at indicated concentrations were added simultaneously for 24 h. The protein biosynthesis rate was determined using puromycylation assay.

**c)** Quantification of the effects of rocaglate and BHA treatment on aggressome formation induced by TNF in B6.Sst1S BMDMs using particle analysis module in ImageJ software.

**d)** Effects of an oxidative stress inhibitor BHA on TNF-induced Trb3 and Chac1 mRNA levels in B6.Sst1S BMDMs. BHA was added 2 or 8 hours after TNF stimulation. The mRNA levels were determined using qRT-PCR at 18 h of TNF stimulation. % inhibition was calculated as compared to TNF stimulated untreated cells.

**f)** ROS production in B6wt and B6.Sst1S BMDM stimulated with 10ng/ml TNF $\alpha$  for the indicated times. Flow cytometry analysis was performed using DCFDA (dichlorofluoresceindiacete) probe (Abcam).
