# Supplementary material
Source: PubMed Central journal article supplement (PMC7843230)
Supplement: jci-131-130319-s039.pdf [file jci-131-130319-s039.pdf]

Supplemental Table 1. Differential gene expression in TNF-stimulated BMDM mediated by the *sst1* locus

| <i>P</i> threshold | expected | untreated | TNF-treated |
|--------------------|----------|-----------|-------------|
| 0.05               | 1260     | 1741      | 4918        |
| 0.01               | 252      | 453       | 2296        |
| 0.005              | 126      | 231       | 1628        |
| 0.001              | 25       | 42        | 595         |
